# Supplementary material for: Correlating synergistic reinforcement with chain motion in elastomer/nanocarbon hybrids composites
Source: Royal Society of Chemistry journal article supplement (doi:10.1039/c6sm01116k), 2016-01-01
Supplement: c6sm01116k1.pdf [file c6sm01116k1.pdf]

## Supporting information

# Correlating Synergistic Reinforcement with Chain Motion in Elastomer/Nanocarbon Hybrids Composites

Siwu Wu<sup>a</sup>, Liqun Zhang<sup>b</sup>, Peijin Weng<sup>a</sup>, Zhijun Yang<sup>a</sup>, Zhenghai Tang<sup>a</sup> and Baochun Guo<sup>a,\*</sup>

<sup>a</sup>Department of Polymer Materials and Engineering, South China University of Technology, Guangzhou, 510640, P.R China

<sup>b</sup>State Key Laboratory of Organic/Inorganic Composites, Beijing University of Chemical Technology, Beijing, 100029, P. R. China.

Correspondence to: Baochun Guo (psbcguo@scut.edu.cn)

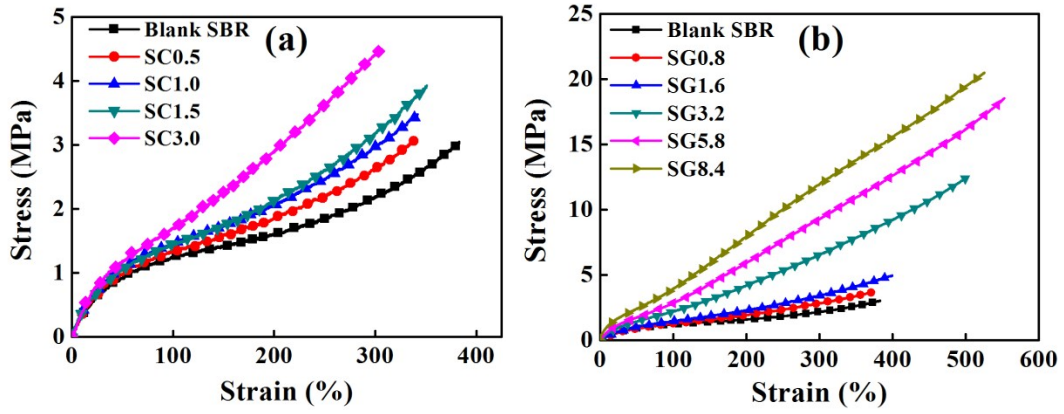

Figure S1. Typical stress-strain curves of SBR/CNTs (a) and SBR/rGO (b) composites

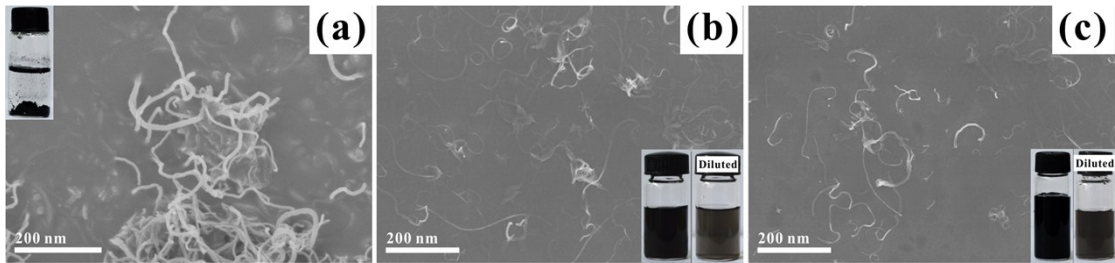

Figure S2. SEM images of pristine CNTs (a) and rGO-CNTs hybrid suspensions with different rGO/CNTs ratios at (b) 3:1 and (c) 2:1.

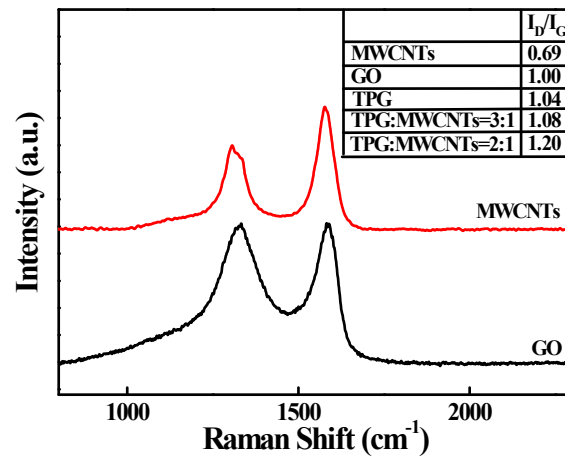

Figure S3. Raman spectra of GO and MWCNTs

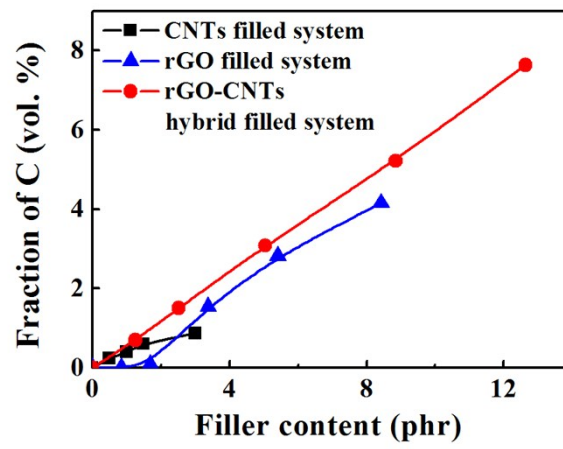

Figure S4. The computed  $C$  values of SBR composites with different fillers as a function of filler content.

Table S1. Experimental values of mechanical properties for SBR composites with different filler.

|          | TS <sup>a</sup> | TE <sup>b</sup> | T <sup>c</sup> | Synergy (%) |      |       | EB <sup>d</sup> |
|----------|-----------------|-----------------|----------------|-------------|------|-------|-----------------|
|          |                 |                 |                | TS          | TE   | T     |                 |
| Pure SBR | 3.2             | 8.6             | 6.3            |             |      |       | 392             |
| SG3      | 12.2            | 21.4            | 29.9           |             |      |       | 568             |
| SC0.5    | 3.0             | 7.8             | 5.8            |             |      |       | 329             |
| SG3C0.5  | 15.4            | 23.0            | 34.9           | 95.9        | 57.8 | 95.3  | 580             |
| SC1      | 3.4             | 8.6             | 6.6            |             |      |       | 330             |
| SG3C1    | 18.5            | 23.2            | 48.0           | 130.5       | 55.2 | 163.1 | 644             |
| SC1.5    | 3.94            | 10.4            | 7.1            |             |      |       | 341             |
| SG3C1.5  | 20.0            | 27.7            | 52.7           | 140.2       | 74.1 | 184.3 | 632             |
| SC3      | 4.5             | 12.2            | 7.2            |             |      |       | 321             |
| SG3C3    | 20.2            | 28.0            | 49.1           | 134.86      | 67.1 | 164.2 | 603             |

<sup>a</sup>TS: Tensile strength, MPa. <sup>b</sup>TE: Tear Strength, kN/m. <sup>c</sup>T: Toughness, MJ/m<sup>3</sup>.

<sup>d</sup>EB: Elongation at Break, %.

Table S2. Experimental values of mechanical properties for rGO-CNTs hybrid filled SBR composites at a rGO-CNTs weight ratio of 2:1.

|           | TS <sup>a</sup> | TE <sup>b</sup> | T <sup>c</sup> | EB <sup>d</sup> |
|-----------|-----------------|-----------------|----------------|-----------------|
| SG0.8C0.4 | 3.9             | 14.2            | 8.1            | 375             |
| SG1.6C0.8 | 10.9            | 22.6            | 24.4           | 557             |
| SG3.2C1.6 | 20.7            | 29.7            | 50.9           | 600             |
| SG5.8C2.9 | 24.0            | 30.3            | 64.9           | 572             |
| SG8.4C4.2 | 26.0            | 37.2            | 64.3           | 496             |

<sup>a</sup>TS: Tensile strength, MPa. <sup>b</sup>TE: Tear Strength, kN/m. <sup>c</sup>T: Toughness, MJ/m<sup>3</sup>. <sup>d</sup>EB: Elongation at Break, %.

Table S3. Experimental values of  $E'$  at rubbery state,  $\tan \delta$  peak, energy loss fraction  $W$  and volume fraction of confining region  $C$  for SBR composites with different fillers.

|           | $E'$ at 30 °C | Tan $\delta$ peak<br>value | $W$   | $C$ (%) |
|-----------|---------------|----------------------------|-------|---------|
| Blank SBR | 2.49          | 1.715                      | 0.844 | 0       |
| SC0.5     | 2.79          | 1.693                      | 0.842 | 0.231   |
| SC1       | 2.90          | 1.675                      | 0.840 | 0.398   |
| SC1.5     | 2.99          | 1.655                      | 0.839 | 0.585   |
| SC3       | 3.85          | 1.626                      | 0.836 | 0.868   |
| SG0.8     | 3.19          | 1.717                      | 0.844 | 0.065   |
| SG1.6     | 3.45          | 1.708                      | 0.843 | 0.087   |
| SG3       | 5.74          | 1.571                      | 0.832 | 1.191   |
| SG5.8     | 9.04          | 1.448                      | 0.812 | 2.822   |
| SG8.4     | 12.44         | 1.345                      | 0.810 | 4.153   |
| SG0.8C0.4 | 3.23          | 1.644                      | 0.838 | 0.694   |
| SG1.6C0.8 | 3.66          | 1.565                      | 0.831 | 1.504   |
| SG3C1.5   | 6.04          | 1.436                      | 0.818 | 2.973   |
| SG5.8C2.9 | 9.60          | 1.270                      | 0.800 | 5.222   |
| SG8.4C4.2 | 13.53         | 1.124                      | 0.779 | 7.635   |

Table S4. Freezing-point depression of swollen SBR composites with different fillers.

|           | $\Delta T$ (°C) |
|-----------|-----------------|
| Blank SBR | -               |
| SC1.5     | 1.3             |
| SG3       | 3.2             |
| SG3C1.5   | 6.3             |
| SG0.8C0.4 | 1.1             |
| SG8.4C4.2 | 9.8             |
